# Supplementary material
Source: PubMed Central journal article supplement (PMC2651679)
Supplement: NIHMS68225-supplement-01.pdf [file NIHMS68225-supplement-01.pdf]

SUPPLEMENTAL TABLE. Markers used in the association study. The number of markers per gene studied, the minor allele frequency in the complete sample (n=561), the physical distance (dbSNP build 123) to the preceding marker, and functional orientation for 51 SNPs and one length polymorphism (54 bp VNTR) are shown.

| Gene          | No. | Marker     | Alleles | Minor allele | Minor allele frequency | Distance (KB) | Function   |
|---------------|-----|------------|---------|--------------|------------------------|---------------|------------|
| <i>ARNTL</i>  | 1   | rs2279287  | C/T     | T            | 0.2982                 |               | within 2kb |
|               | 2   | rs1982350  | A/G     | A            | 0.3866                 | 51.65         | 5' utr     |
|               | 3   | rs7126303  | C/T     | C            | 0.3851                 | 20.40         | 5' utr     |
|               | 4   | rs3789327  | A/G     | G            | 0.4562                 | 14.78         | intron     |
|               | 5   | rs2278749  | C/T     | T            | 0.164                  | 12.56         | intron     |
| <i>CLOCK</i>  | 1   | rs1801260  | AG      | G            | 0.2669                 |               | utr        |
|               | 2   | rs11240    | C/G     | G            | 0.2813                 | 17.98         | intron     |
|               | 3   | rs3805151  | C/T     | C            | 0.3348                 | 17.69         | intron     |
|               | 4   | rs7684810  | TC      | C            | 0.3608                 | 15.75         | utr        |
|               | 5   | rs11133399 | A/G     | G            | 0.3685                 | 61.04         | within 2kb |
| <i>CRY2</i>   | 1   | rs10838524 | A/G     | A            | 0.4677                 |               | intron     |
|               | 2   | rs2037311  | A/G     | G            | 0.0361                 | 3.27          | intron     |
|               | 3   | rs2292913  | A/G     | A            | 0.0661                 | 4.08          | intron     |
|               | 4   | rs1401419  | C/T     | C            | 0.4893                 | 2.21          | intron     |
|               | 5   | rs1401417  | C/G     | G            | 0.2299                 | 0.37          | intron     |
| <i>CSNK1□</i> | 1   | rs135745   | C/G     | G            | 0.4759                 |               | > 2kb      |
|               | 2   | rs135749   | A/G     | G            | 0.1914                 | 1.88          | > 2kb      |
|               | 3   | rs1005473  | A/C     | C            | 0.0588                 | 8.85          | intron     |
|               | 4   | rs1534891  | C/T     | T            | 0.1105                 | 0.73          | intron     |
|               | 5   | rs1997644  | A/G     | G            | 0.4696                 | 20.12         | within 2kb |
|               | 6   | rs5757037  | A/G     | A            | 0.352                  | 3.97          | > 2kb      |
| <i>DBP</i>    | 1   | hCV3098471 | A/G     | A            | 0.0875                 |               | intron     |
|               | 2   | rs447802   | C/T     | C            | 0.2724                 | 3.37          | 91Ala/Thr  |
|               | 3   | rs3745734  | C/G     | C            | 0.0457                 | 18.03         | intron     |
|               | 4   | rs550455   | C/T     | C            | 0.2786                 | 2.13          | intron     |
|               | 5   | rs281391   | C/T     | T            | 0.2148                 | 28.23         | > 2kb      |
| <i>GSK3□</i>  | 1   | rs3732359  | A/G     | G            | 0.2625                 |               | utr        |
|               | 2   | rs3732360  | C/T     | C            | 0.3013                 | 0.15          | utr        |
|               | 3   | rs1719889  | A/T     | A            | 0.2379                 | 42.21         | intron     |

|              |   |            |     |     |        |       |              |
|--------------|---|------------|-----|-----|--------|-------|--------------|
|              | 4 | rs6795653  | C/T | C   | 0.4428 | 31.78 | intron       |
|              | 5 | rs2319399  | A/G | A   | 0.4428 | 25.64 | intron       |
|              | 6 | rs12638973 | C/T | T   | 0.2066 | 48.62 | intron       |
|              | 7 | rs12635018 | C/T | T   | 0.2057 | 64.94 | intron       |
|              | 8 | rs2199503  | A/G | G   | 0.2723 | 28.72 | intron       |
|              | 9 | rs334559   | A/G | A   | 0.2276 | 31.12 | intron       |
| <i>NPAS2</i> | 1 | 471LEU/SER | C/T | T   | 0.1598 |       | 471Leu/Ser   |
| <i>PER1</i>  | 1 | rs2289591  | A/C | A   | 0.2362 |       | intron       |
|              | 2 | rs2253820  | C/T | T   | 0.1845 | 0.16  | synonymous   |
|              | 3 | rs3027188  | C/G | G   | 0.1634 | 0.82  | intron       |
|              | 4 | rs10462024 | G/A | G   | 0.3872 | 2.65  | intron       |
|              | 5 | rs3027178  | G/T | G   | 0.2941 | 1.45  | synonymous   |
| <i>PER2</i>  | 1 | rs934945   | G/A | A   | 0.1803 |       | 1244Glu/Gly  |
|              | 2 | rs6431590  | A/G | G   | 0.3119 | 10.08 | intron       |
|              | 3 | rs2304670  | G/A | A   | 0.0713 | 0.51  | synonymous   |
|              | 4 | rs3739064  | A/G | G   | 0.1889 | 10.75 | intron       |
|              | 5 | rs2304672  | C/G | C   | 0.0686 | 10.20 | utr          |
| <i>PER3</i>  | 1 | rs228729   | C/T | T   | 0.325  |       | intron       |
|              | 2 | rs228642   | C/T | C   | 0.4454 | 17.60 | intron       |
|              | 3 | rs228666   | C/T | C   | 0.3529 | 5.43  | intron       |
|              | 4 | rs228697   | C/G | G   | 0.1236 | 18.85 | 856Ala/Pro   |
|              | 5 | rs2859388  | A/G | G   | 0.3775 | 0.64  | intron       |
|              | 6 | 54 bp VNTR | 4/5 | 363 | 0.3306 | 1.80  | VNTR in exon |

---
